# Supplementary material
Source: publisher figshare collection journal article supplement (https://gsapubs.figshare.com/ndownloader/files/23296232)
Supplement: Supplementary file 1 [file 23296232]

**DR Table 1: Optically Stimulated Luminescence (OSL) Age Information**

| Sample number | USU number | Depth (m) | Num. of aliquots <sup>1</sup> | Dose Rate (Gy/ka) <sup>2</sup> | Equivalent Dose, De (Gy) <sup>3</sup> | Overdispersion (%) <sup>4</sup> | OSL age (ka) <sup>5</sup> |
|---------------|------------|-----------|-------------------------------|--------------------------------|---------------------------------------|---------------------------------|---------------------------|
| LS-TC-1       | USU-425    | 1.9       | 24 (45)                       | 1.92 ± 0.09                    | 25.48 ± 2.56                          | 17.7 ± 3.0                      | 13.27 ± 1.59              |
| LS-TK-1       | USU-426    | 1.9       | 26 (71)                       | 2.11 ± 0.09                    | 11.18 ± 1.05                          | 15.3 ± 2.7                      | 5.30 ± 0.60               |
| LS-TL-1       | USU-427    | 1.1       | 24 (53)                       | 2.25 ± 0.10                    | 12.85 ± 1.10                          | 16.5 ± 2.8                      | 5.70 ± 0.61               |
| LS-TR-1       | USU-428    | 2.5       | 30 (45)                       | 1.92 ± 0.09                    | 14.76 ± 0.84                          | 18.1 ± 2.7                      | 7.68 ± 0.66               |
| LS-TV-1       | USU-429    | 1.5       | 28 (47)                       | 1.71 ± 0.09                    | 6.75 ± 0.66                           | 32.8 ± 4.8                      | 3.94 ± 0.47               |
| LS-TW-1       | USU-430    | 2.0       | 26 (55)                       | 2.18 ± 0.10                    | 5.43 ± 1.17                           | 38.6 ± 5.7                      | 2.49 ± 0.56               |
| LS-TX-1       | USU-431    | 0.7       | 23 (55)                       | 2.07 ± 0.10                    | 6.87 ± 0.60                           | 14.9 ± 3.2                      | 3.31 ± 0.36               |
| LS-TY-1       | USU-432    | 2.3       | 22 (63)                       | 2.08 ± 0.09                    | 4.55 ± 0.90                           | 47.2 ± 7.5                      | 2.19 ± 0.46               |
| LS-TZ-1       | USU-433    | 0.7       | 27 (52)                       | 2.28 ± 0.10                    | 2.77 ± 0.90                           | 46.5 ± 8.2                      | 1.21 ± 0.40               |
| Paleo1        | USU-590    | 2.3       | 31 (50)                       | 1.66 ± 0.08                    | 18.86 ± 2.14                          | 20.5 ± 3.0                      | 11.37 ± 1.51              |
| Paleo2        | USU-591    | 2.3       | 30 (45)                       | 1.69 ± 0.08                    | 18.08 ± 1.52                          | 21.4 ± 3.0                      | 10.73 ± 1.14              |
| Paleo3        | USU-592    | 2.3       | 34 (49)                       | 1.69 ± 0.08                    | 18.19 ± 1.60                          | 20.5 ± 2.8                      | 10.75 ± 1.20              |

OSL ages determined using the single-aliquot regenerative dose (SAR) technique (Murray and Wintle, 2000) and minimum age model (Galbraith et al 1999) on small aliquots of 90-150mm quartz sand.

<sup>1</sup> Number of accepted aliquots used in age calculation and number of aliquots analyzed in parentheses.

<sup>2</sup> Determined from ICP-MS and ICP-AES analysis and dose rate conversion by Guerin et al. (2011). See DR Table 2 for details.

<sup>3</sup> De calculated using the three-parameter minimum age model of Galbraith et al. (1999) and reported at 2-sigma standard error.

<sup>4</sup> Overdispersion represents the scatter in equivalent dose values beyond instrumental error, values > 20% in part suggest partial bleaching.

<sup>5</sup> Error on OSL age incorporates all random and systematic errors summed in quadrature and is presented as 2-sigma standard error.

**DR Table 2: Dose Rate Information for OSL samples**

| Sample number | USU number | <i>In-situ</i> H <sub>2</sub> O <sup>1</sup> | U (ppm)   | Th (ppm)  | %K          | Rb (ppm)   | Cosmic <sup>2</sup> (Gy/ka) | Dose Rate <sup>3</sup> (Gy/ka) |
|---------------|------------|----------------------------------------------|-----------|-----------|-------------|------------|-----------------------------|--------------------------------|
| LS-TC-1       | USU-425    | 2.7%                                         | 1.2 ± 0.1 | 4.9 ± 0.4 | 1.16 ± 0.03 | 42.7 ± 1.7 | 0.17 ± 0.02                 | 1.92 ± 0.09                    |
| LS-TK-1       | USU-426    | 7.4%                                         | 1.7 ± 0.1 | 5.3 ± 0.5 | 1.32 ± 0.03 | 57.5 ± 2.3 | 0.17 ± 0.02                 | 2.11 ± 0.09                    |
| LS-TL-1       | USU-427    | 6.7%                                         | 1.8 ± 0.1 | 5.5 ± 0.5 | 1.39 ± 0.03 | 60.7 ± 2.4 | 0.19 ± 0.02                 | 2.25 ± 0.10                    |
| LS-TR-1       | USU-428    | 3.2%                                         | 1.2 ± 0.1 | 4.6 ± 0.4 | 1.20 ± 0.03 | 47.0 ± 1.9 | 0.16 ± 0.02                 | 1.92 ± 0.09                    |
| LS-TV-1       | USU-429    | 15.0%                                        | 1.1 ± 0.1 | 4.8 ± 0.4 | 1.21 ± 0.03 | 45.9 ± 1.8 | 0.18 ± 0.02                 | 1.71 ± 0.09                    |
| LS-TW-1       | USU-430    | 7.2%                                         | 1.6 ± 0.1 | 5.4 ± 0.5 | 1.40 ± 0.04 | 55.1 ± 2.2 | 0.17 ± 0.02                 | 2.18 ± 0.10                    |
| LS-TX-1       | USU-431    | 12.2%                                        | 1.5 ± 0.1 | 6.1 ± 0.6 | 1.38 ± 0.03 | 64.9 ± 2.6 | 0.20 ± 0.02                 | 2.07 ± 0.10                    |
| LS-TY-1       | USU-432    | 9.2%                                         | 1.5 ± 0.1 | 5.9 ± 0.5 | 1.34 ± 0.03 | 51.0 ± 2.0 | 0.16 ± 0.02                 | 2.08 ± 0.09                    |
| LS-TZ-1       | USU-433    | 3.2%                                         | 1.6 ± 0.1 | 5.4 ± 0.5 | 1.37 ± 0.03 | 57.8 ± 2.3 | 0.20 ± 0.02                 | 2.28 ± 0.10                    |
| Paleo1        | USU-590    | 15.3%                                        | 1.3 ± 0.1 | 5.2 ± 0.5 | 1.10 ± 0.03 | 36.9 ± 1.5 | 0.16 ± 0.02                 | 1.66 ± 0.08                    |
| Paleo2        | USU-591    | 3.9%                                         | 1.0 ± 0.1 | 3.7 ± 0.3 | 1.08 ± 0.03 | 36.3 ± 1.5 | 0.16 ± 0.02                 | 1.69 ± 0.08                    |
| Paleo3        | USU-592    | 13.4%                                        | 1.3 ± 0.1 | 6.9 ± 0.6 | 0.98 ± 0.02 | 35.6 ± 1.4 | 0.16 ± 0.02                 | 1.69 ± 0.08                    |

Radioelemental concentrations determined by ICP-MS and ICP-AES techniques from ALS Chemex, Reno Nevada, USA

<sup>1</sup> Measured in the lab following field sampling. In samples were *in-situ* H<sub>2</sub>O values were <3%, a representative of moisture content of 3±3% was assumed for burial history.

<sup>2</sup> Contribution of cosmic radiation to the dose rate was calculated by using sample depth (see Table DR 1), elevation (0.29 km asl), and longitude/latitude (44N/94W) following Prescott and Hutton (1994).

<sup>3</sup> Dose rate was derived using conversion factors from Guerin et al. (2011) and includes cosmic contribution and attenuating affects of moisture.

**DR Table 3. AMS Radiocarbon ages from terraces**

| Terrace name          | Lab number    | Distance Upstream (km) | Terrace Height (m) | Terrace Elevation (m) | $\delta^{13}\text{C}$ | Radiocarbon Age (ka BP) | <sup>2</sup> Calibrated Age (cal ka BP <sub>2010</sub> ) |
|-----------------------|---------------|------------------------|--------------------|-----------------------|-----------------------|-------------------------|----------------------------------------------------------|
| LS-16-00              | Beta - 261877 | 9.74                   | 9.10               | 256.9                 | -7.8                  | 5.03±0.05               | 5.84 ± 0.12                                              |
| LS-08-01              | Beta - 261876 | 12.43                  | 9.90               | 259.8                 | -8.5                  | 6.51±0.05               | 7.50 ± 0.12                                              |
| LS-TV-01 <sup>3</sup> | Beta - 249184 | 15.42                  | 7.7                | 261.5                 | -11.2                 | 3.09±0.04               | 3.36 ± 0.09                                              |
| LS-TV-02 <sup>3</sup> | Beta - 249185 | 15.42                  | 7.7                | 261.5                 | -8.8                  | 6.48±0.05               | 7.41 ± 0.08                                              |
| LS-TR-01              | Beta - 249183 | 15.95                  | 16.5               | 270.5                 | -9.5                  | 7.63±0.05               | 8.51 ± 0.09                                              |
| LS-22-06              | Beta - 261879 | 16.00                  | 2.30               | 256.4                 | -7.2                  | 4.71±0.05               | 5.51 ± 0.13                                              |
| LS-22-04              | Beta - 261878 | 18.08                  | 5.30               | 262.4                 | -6.3                  | 4.58±0.05               | 5.31 ± 0.21                                              |
| LS-90-05              | Beta - 261883 | 20.73                  | 24.06              | 283.8                 | -9.4                  | 9.95±0.06               | 11.52 ± 0.23                                             |
| LS-90-03 <sup>1</sup> | Beta - 260720 | 23.69                  | 11.71              | 276.1                 | -7.9                  | 6.58±0.07               | 7.52 ± 0.13                                              |
| LS-90-01              | Beta - 261882 | 23.92                  | 3.89               | 268.6                 | -9.1                  | 2.62±0.05               | 2.74 ± 0.17                                              |
| LS-TW-01 <sup>3</sup> | Beta - 249186 | 24.38                  | 5.83               | 270.8                 | -8.1                  | 2.33±0.04               | 2.38 ± 0.15                                              |
| LS-TW-02 <sup>3</sup> | Beta - 249185 | 24.38                  | 5.83               | 270.8                 | -12.5                 | 3.45±0.04               | 3.79 ± 0.11                                              |
| LS-41-10              | Beta - 261881 | 26.63                  | 10.19              | 279.4                 | -6.7                  | 4.57±0.05               | 5.31 ± 0.20                                              |
| LS-TP-01              | Beta - 255541 | 28.18                  | 7.54               | 279.1                 | -9.6                  | 4.33±0.04               | 4.99 ± 0.10                                              |
| LS-41-01              | Beta- 261880  | 30.10                  | 15.21              | 290.3                 | -7.8                  | 4.98±0.07               | 5.26 ± 0.07                                              |

Data modified from Johnson (2012). Material dated in all samples were freshwater mollusks and gastropods.

<sup>1</sup> Dated using radiometric technique, all others dated using AMS.

<sup>2</sup> Calibrated radiocarbon ages calculated as the median value using the IntCal09 calibration curve (Reimer et al. 2009), error based on 2-sigma calibrated age range. Calibrated ages were converted to BP<sub>2010</sub> by addition of 60 years.

<sup>3</sup> Terraces 'V' and 'W' had two units dated, one from basal sediments and one from the highest alluvial sediments. The results from the older strath sediments were used to assign a terrace age.

## Data Repository - OSL sample processing and analysis

### *Sample collection and preparation*

OSL samples were collected in opaque tubes pounded into sediment exposures. Samples were opened in the Utah State University Luminescence laboratory under dim amber light and wet sieved to separate the 90-150  $\mu\text{m}$  fraction. Samples were treated with hydrochloric acid to remove carbonates, floated in 2.7  $\text{g/cm}^3$  sodium polytungstate to remove heavy minerals and exposed to three 30-minute treatments of concentrated hydrofluoric acid to remove feldspars and etch the quartz. Infra-red (IR) stimulation was used to detect the presence of feldspar and to assure the purity of the quartz separate, aliquots containing feldspars were removed from final equivalent-dose calculation.

### *Dosimetry*

Representative samples for dose rate were collected from sediments surrounding the sample tube and analyzed for concentrations of U, Th, Rb, and K using ICP-MS and ICP-AES (performed by ALS CHEMEX Labs). Dose rate conversions followed Guerin et al. (2011). The contribution of cosmic radiation to the dose rate was calculated using sample depth, elevation, and latitude/longitude following Prescott and Hutton (1994). Final, dose rates were calculated based on water content, sediment chemistry, and cosmic contribution; errors were calculated in quadrature using the methods of Aitken and Alldred (1972) and Aitken (1976, 1985) (Table DR2).

### *Optical measurements*

Optical measurements were performed on 1-mm aliquots of the quartz separates (~70 grains) using RISØ TL/OSL-DA-20 readers with blue-green LED stimulation ( $470 \pm 30 \text{ nm}$ ,  $36 \text{ mW/cm}^2$ ) and photon detection through 7-mm Hoya U340 filters ( $330 \pm 50 \text{ nm}$ ). Preheat temperatures prior to measurement were  $240^\circ\text{C}$  for 10s for regenerative and natural doses and  $160^\circ\text{C}$  for 0s for test doses. Equivalent doses were determined using the single-aliquot regenerative-dose (SAR) technique of Murray and Wintle (2000). Equivalent doses ( $D_e$ ) were calculated on a minimum of 22 aliquots using the three-parameter minimum age model of Galbraith et al. (1999) and reported at 2-sigma standard error.

### **References Cited**

- Aitken, M.J., 1976. Thermoluminescent age evaluation and assessment of error limits: revised system. *Archaeometry* 18, 233-238.
- Aitken, M.J., 1985. *Thermoluminescence Dating*. Academic Press, London, 359 pp.
- Aitken, M.J., Alldred, J.C., 1972. The assessment of error limits in thermoluminescent dating. *Archaeometry* 14, 257-267.
- Galbraith, R.F., Roberts, R.G., Laslett, G.M., Yoshida, H., Olley, J.M. 1999. Optical dating of single and multiple grains of quartz from Jinmium rock shelter, northern Australia. Part I: experimental design and statistical models. *Archaeometry* 41, 339-364.
- Guerin, G., Mercier, N., Adamiec, G., 2011. Dose-rate conversion factors: update: *Ancient TL* 29, 5-8.
- Johnson, A.L., 2012. Timing and pattern of valley excavation, Le Sueur River, south-central Minnesota, USA. [M.S. Thesis]: University of Minnesota, Duluth, 53 p.
- Murray, A.S. Wintle, A.G, 2000. Luminescence dating of quartz using an improved single-aliquot regenerative-dose protocol. *Radiation Measurements* 32, 57-73.
- Prescott, J. R., Hutton, J.T., 1994. Cosmic ray contributions to dose rates for luminescence and ESR dating: large depths and long-term time variations. *Radiation Measurements* 23, 497-500.
